# Supplementary material for: Reliability, Validity, and Responsiveness of the Chinese Learning Accomplishment Profile (C-LAP)
Source: MDPI journal article supplement (doi:10.3390/children8110974), 2021-10-28
Supplement: s1 [file s1]

**Table S1.** Characteristics of the samples used for examining *SRM* for children's developmental age obtained from two tests with a time gap of 3 months.

| Variable                            | Total<br>( <i>n</i> = 200) | Participants' Chronological Age (m) |                          |                           |                           |
|-------------------------------------|----------------------------|-------------------------------------|--------------------------|---------------------------|---------------------------|
|                                     |                            | 1~5<br>( <i>n</i> = 22)             | 6~12<br>( <i>n</i> = 62) | 13~24<br>( <i>n</i> = 84) | 25~36<br>( <i>n</i> = 32) |
| Period, <i>n</i> (%)                |                            |                                     |                          |                           |                           |
| 2013–2015                           | 79 (39.5)                  | 7 (31.8)                            | 31 (50)                  | 32 (38.1)                 | 9 (28.1)                  |
| 2016–2019                           | 121 (60.5)                 | 15 (68.2)                           | 31 (50)                  | 52 (61.9)                 | 23 (71.9)                 |
| Province, <i>n</i> (%)              |                            |                                     |                          |                           |                           |
| Shanghai                            | 177 (88.5)                 | 22 (100)                            | 53 (85.5)                | 73 (86.9)                 | 29 (90.6)                 |
| Other                               | 23 (11.5)                  | 0 (0)                               | 9 (14.5)                 | 11 (13.1)                 | 3 (9.4)                   |
| Gender, <i>n</i> (%)                |                            |                                     |                          |                           |                           |
| Male                                | 106 (53)                   | 10 (45.5)                           | 34 (54.8)                | 45 (53.6)                 | 17 (53.1)                 |
| Female                              | 94 (47)                    | 12 (54.5)                           | 28 (45.2)                | 39 (46.4)                 | 15 (46.9)                 |
| Father's education,<br><i>n</i> (%) |                            |                                     |                          |                           |                           |
| Postgraduate                        | 24 (12)                    | 2 (9.1)                             | 8 (12.9)                 | 10 (11.9)                 | 4 (12.5)                  |
| Bachelor                            | 150 (75)                   | 18 (81.8)                           | 45 (72.6)                | 62 (73.8)                 | 25 (78.1)                 |
| Junior college                      | 23 (11.5)                  | 1 (4.5)                             | 8 (12.9)                 | 11 (13.1)                 | 3 (9.4)                   |
| High school or below                | 3 (1.5)                    | 1 (4.5)                             | 1 (1.6)                  | 1 (1.2)                   | 0 (0)                     |
| Mather's education,<br><i>n</i> (%) |                            |                                     |                          |                           |                           |
| Postgraduate                        | 15 (7.5)                   | 1 (4.5)                             | 6 (9.7)                  | 6 (7.1)                   | 2 (6.2)                   |
| Bachelor                            | 159 (79.5)                 | 18 (81.8)                           | 50 (80.6)                | 66 (78.6)                 | 25 (78.1)                 |
| Junior college                      | 25 (12.5)                  | 2 (9.1)                             | 6 (9.7)                  | 12 (14.3)                 | 5 (15.6)                  |
| High school or below                | 1 (0.5)                    | 1 (4.5)                             | 0 (0)                    | 0 (0)                     | 0 (0)                     |
| Paternal age (y),<br><i>n</i> (%)   |                            |                                     |                          |                           |                           |
| ≤25                                 | 6 (3)                      | 0 (0)                               | 3 (4.8)                  | 3 (3.6)                   | 0 (0)                     |
| 26–30                               | 53 (26.5)                  | 9 (40.9)                            | 17 (27.4)                | 19 (22.6)                 | 8 (25)                    |
| 31–35                               | 92 (46)                    | 10 (45.5)                           | 29 (46.8)                | 39 (46.4)                 | 14 (43.8)                 |
| 36–40                               | 40 (20)                    | 2 (9.1)                             | 11 (17.7)                | 18 (21.4)                 | 9 (28.1)                  |
| ≥41                                 | 9 (4.5)                    | 1 (4.5)                             | 2 (3.2)                  | 5 (6)                     | 1 (3.1)                   |
| Maternal age (y),<br><i>n</i> (%)   |                            |                                     |                          |                           |                           |
| ≤25                                 | 9 (4.5)                    | 2 (9.1)                             | 3 (4.8)                  | 3 (3.6)                   | 1 (3.1)                   |
| 26–30                               | 84 (42)                    | 7 (31.8)                            | 29 (46.8)                | 34 (40.5)                 | 14 (43.8)                 |
| 31–35                               | 85 (42.5)                  | 11 (50)                             | 23 (37.1)                | 38 (45.2)                 | 13 (40.6)                 |
| 36–40                               | 18 (9)                     | 2 (9.1)                             | 6 (9.7)                  | 7 (8.3)                   | 3 (9.4)                   |
| ≥41                                 | 4 (2)                      | 0 (0)                               | 1 (1.6)                  | 2 (2.4)                   | 1 (3.1)                   |

**Table S2.** Characteristics of the samples used for examining SRM for children's developmental age obtained from two tests with a time gap of 1–2 months.

| Variable                            | Total<br>( <i>n</i> = 120) | Participants' Chronological Age (m) |                          |                           |                           |
|-------------------------------------|----------------------------|-------------------------------------|--------------------------|---------------------------|---------------------------|
|                                     |                            | 1~5<br>( <i>n</i> = 4)              | 6~12<br>( <i>n</i> = 19) | 13~24<br>( <i>n</i> = 47) | 25~36<br>( <i>n</i> = 50) |
| Period, <i>n</i> (%)                |                            |                                     |                          |                           |                           |
| 2013–2015                           | 77 (64.2)                  | 3 (75)                              | 8 (42.1)                 | 30 (63.8)                 | 36 (72)                   |
| 2016–2019                           | 43 (35.8)                  | 1 (25)                              | 11 (57.9)                | 17 (36.2)                 | 14 (28)                   |
| Province, <i>n</i> (%)              |                            |                                     |                          |                           |                           |
| Shanghai                            | 102 (85)                   | 2 (50)                              | 18 (94.7)                | 41 (87.2)                 | 41 (82)                   |
| Other                               | 18 (15)                    | 2 (50)                              | 1 (5.3)                  | 6 (12.8)                  | 9 (18)                    |
| Gender, <i>n</i> (%)                |                            |                                     |                          |                           |                           |
| Male                                | 77 (64.2)                  | 3 (75)                              | 12 (63.2)                | 27 (57.4)                 | 35 (70)                   |
| Female                              | 43 (35.8)                  | 1 (25)                              | 7 (36.8)                 | 20 (42.6)                 | 15 (30)                   |
| Father's education,<br><i>n</i> (%) |                            |                                     |                          |                           |                           |
| Postgraduate                        | 8 (6.7)                    | 0 (0)                               | 2 (10.5)                 | 3 (6.4)                   | 3 (6)                     |
| Bachelor                            | 83 (69.2)                  | 3 (75)                              | 13 (68.4)                | 32 (68.1)                 | 35 (70)                   |
| Junior college                      | 22 (18.3)                  | 0 (0)                               | 3 (15.8)                 | 9 (19.1)                  | 10 (20)                   |
| High school or below                | 7 (5.8)                    | 1 (25)                              | 1 (5.3)                  | 3 (6.4)                   | 2 (4)                     |
| Mather's education,<br><i>n</i> (%) |                            |                                     |                          |                           |                           |
| Postgraduate                        | 8 (6.7)                    | 0 (0)                               | 2 (10.5)                 | 4 (8.5)                   | 2 (4)                     |
| Bachelor                            | 85 (70.8)                  | 3 (75)                              | 13 (68.4)                | 34 (72.3)                 | 35 (70)                   |
| Junior college                      | 19 (15.8)                  | 0 (0)                               | 4 (21.1)                 | 6 (12.8)                  | 9 (18)                    |
| High school or below                | 8 (6.7)                    | 1 (25)                              | 0 (0)                    | 3 (6.4)                   | 4 (8)                     |
| Paternal age (y),<br><i>n</i> (%)   |                            |                                     |                          |                           |                           |
| ≤25                                 | 4 (3.3)                    | 0 (0)                               | 0 (0)                    | 4 (8.5)                   | 0 (0)                     |
| 26–30                               | 62 (51.7)                  | 2 (50)                              | 8 (42.1)                 | 23 (48.9)                 | 29 (58)                   |
| 31–35                               | 42 (35)                    | 2 (50)                              | 8 (42.1)                 | 16 (34)                   | 16 (32)                   |
| 36–40                               | 6 (5)                      | 0 (0)                               | 1 (5.3)                  | 3 (6.4)                   | 2 (4)                     |
| ≥41                                 | 6 (5)                      | 0 (0)                               | 2 (10.5)                 | 1 (2.1)                   | 3 (6)                     |
| Maternal age (y),<br><i>n</i> (%)   |                            |                                     |                          |                           |                           |
| ≤25                                 | 6 (5)                      | 0 (0)                               | 0 (0)                    | 5 (10.6)                  | 1 (2)                     |
| 26–30                               | 77 (64.2)                  | 3 (75)                              | 13 (68.4)                | 29 (61.7)                 | 32 (64)                   |
| 31–35                               | 28 (23.3)                  | 1 (25)                              | 4 (21.1)                 | 11 (23.4)                 | 12 (24)                   |
| 36–40                               | 7 (5.8)                    | 0 (0)                               | 2 (10.5)                 | 1 (2.1)                   | 4 (8)                     |
| ≥41                                 | 2 (1.7)                    | 0 (0)                               | 0 (0)                    | 1 (2.1)                   | 1 (2)                     |
